# Supplementary material
Source: PubMed Central journal article supplement (PMC3425195)
Supplement: supp_pp.112.200303_200303suppdata.pdf [file supp_pp.112.200303_200303suppdata.pdf]

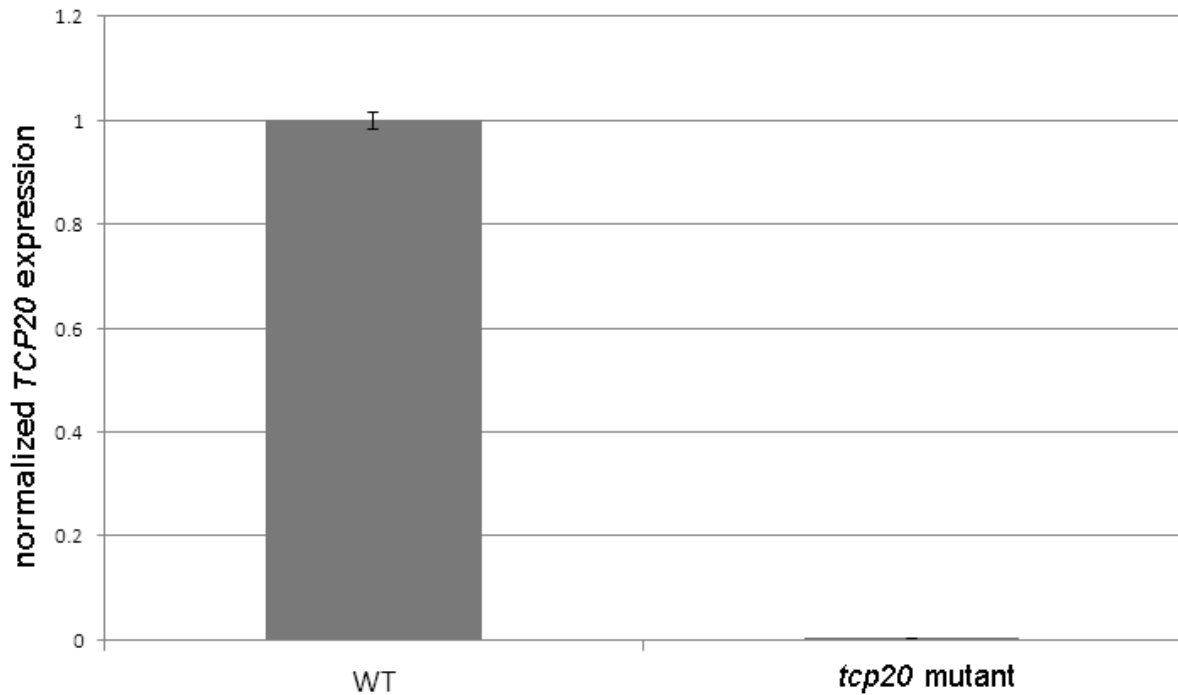

Supplemental figure 1: Expression of *TCP20* in *tcp20* knockout vs. Col-0 wild type plants. Expression was analyzed using Realtime RT-PCR (primers given in Supplemental table 2). *TCP20* expression is hardly detectable in the knockout plants.

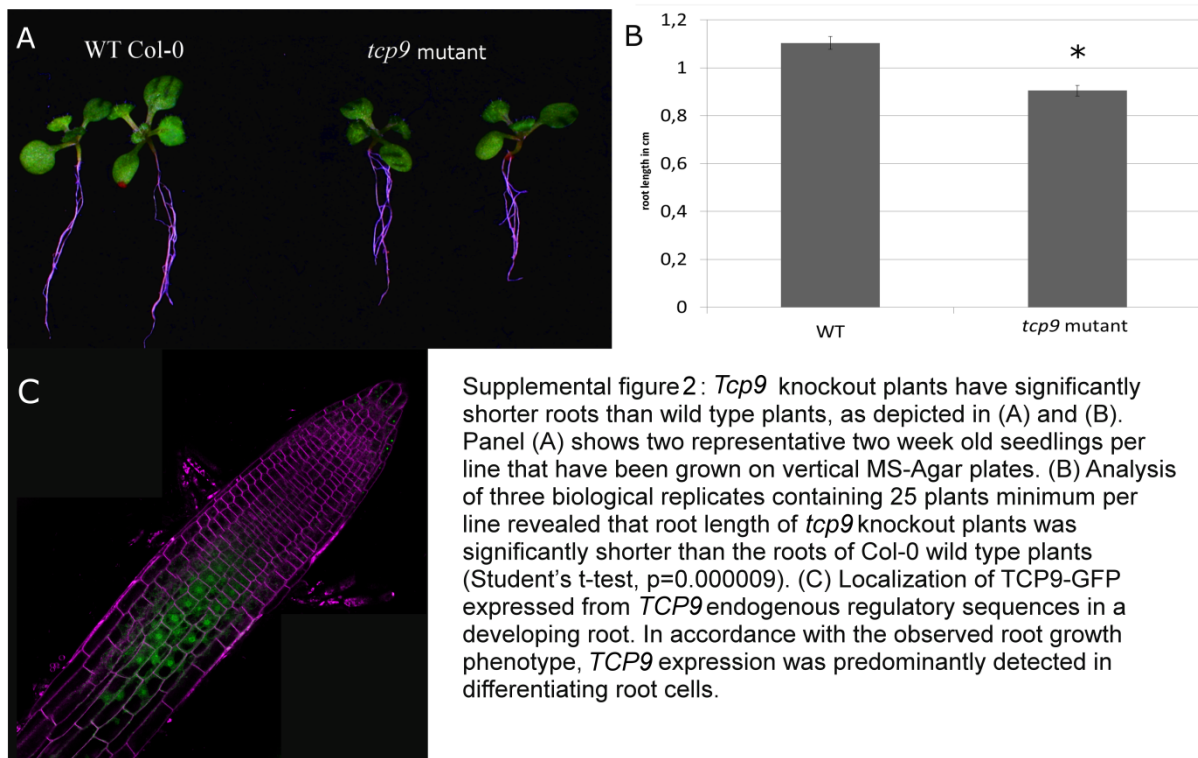

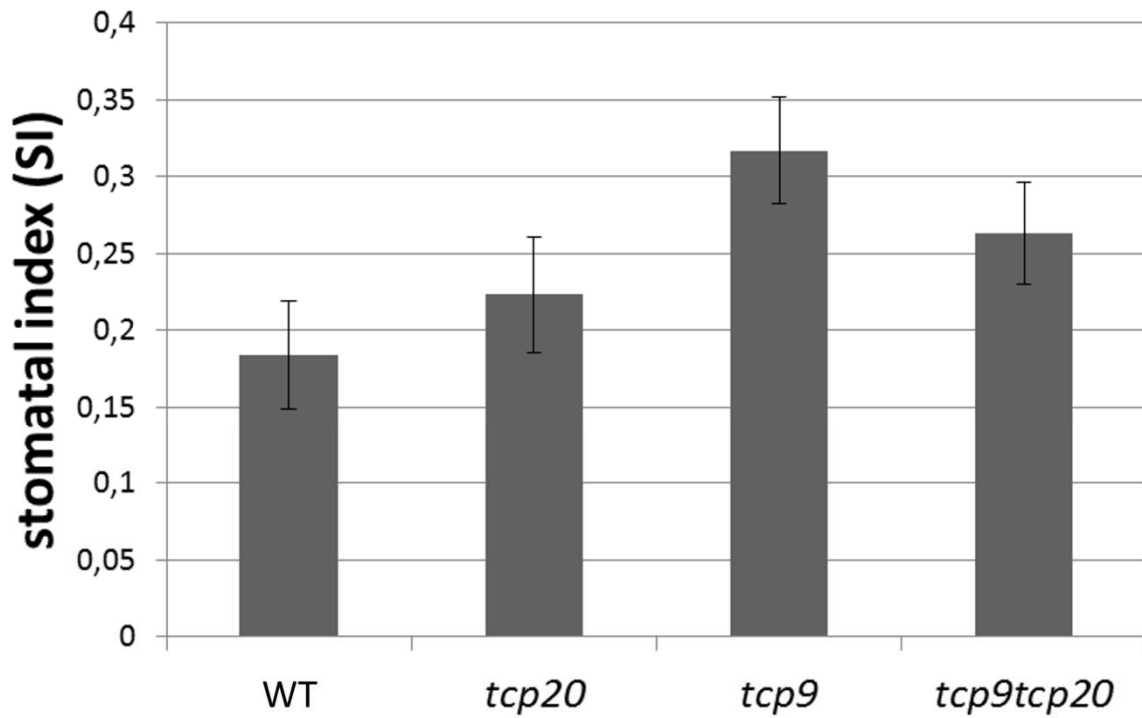

Supplemental figure 3: Stomatal index of class I *tcp* single and double mutants. Calculations were made based on cell drawings as described previously (Andriankaja et al., 2012).

## **Supplemental data 1: Leaf size and shape analysis by LeafAnalyser.**

LeafAnalyser was used to assess differences in leaf shape and size between plant lines (Weight et al., 2008). We had previously defined the natural variation in Arabidopsis leaf shape using a library of 1500 leaves from 10 accessions (Kieffer et al., 2011). For this analysis a full Procrustes fit was applied to all leaves in leaf library. This is a standard method in geometric morphometrics that separates size from variation in shape. A leaf is measured using 48 landmarks along the margin. The landmarks have coordinate values and the average of the x and y coordinate values determines the centroid. Centroid size is then determined by the distance from the centroid to each landmark. Centroid size is used, because it is approximately uncorrelated with every shape variable. This is important because in a geometric sense it is possible that width, length or area correlates with a shape variable (especially in the mean leaf where the position of each landmark is determined by a mean value). A Principal Component analysis was then applied to the dataset of 1500 Procrustes fitted leaf-point models using LeafAnalyser to calculate variation in leaf shape.

The first four principal components (PCs) accounted for 85.44% of the variance in leaf shape and were examined as standard deviations from the mean leaf (Supplemental Fig.4A). Variation along PC1 accounts for 37.16% of the variance in leaf shape. A higher value along PC1 corresponds to a leaf that curves to the left and a lower value with the leaf that curves to the right. Leaves with a higher PC2 value have narrower and elongated petioles with more distally positioned lamina. PC2 accounts for 26.19% of variation in shape. PC3 captures leaf aspect ratio (leaf length:leaf width), and accounts for 13.66% of the variance. Variation along PC4 captures a combination of left right asymmetry and curvature within the leaf and represents 8.43% of variation in shape.

We used LeafAnalyser to generate leaf-point models for the leaves from 8 plants for each of WT, *tcp9*, *tcp20*, and *tcp9 tcp20* lines. We then applied the PCA from the leaf library to these leaf-point models to generate standardized PC scores for each leaf in all four lines. These values were then used reconstruct individual leaves, which were then scaled using the corresponding mean centroid size for each leaf (Supplemental Fig. 4B). We plotted mean PC scores for WT, *tcp9*, *tcp20*, and *tcp9 tcp20* lines ( Supplemental Fig. 4C) and used a one-way anova to confirm that there were no significant differences in leaf size and shape between lines.

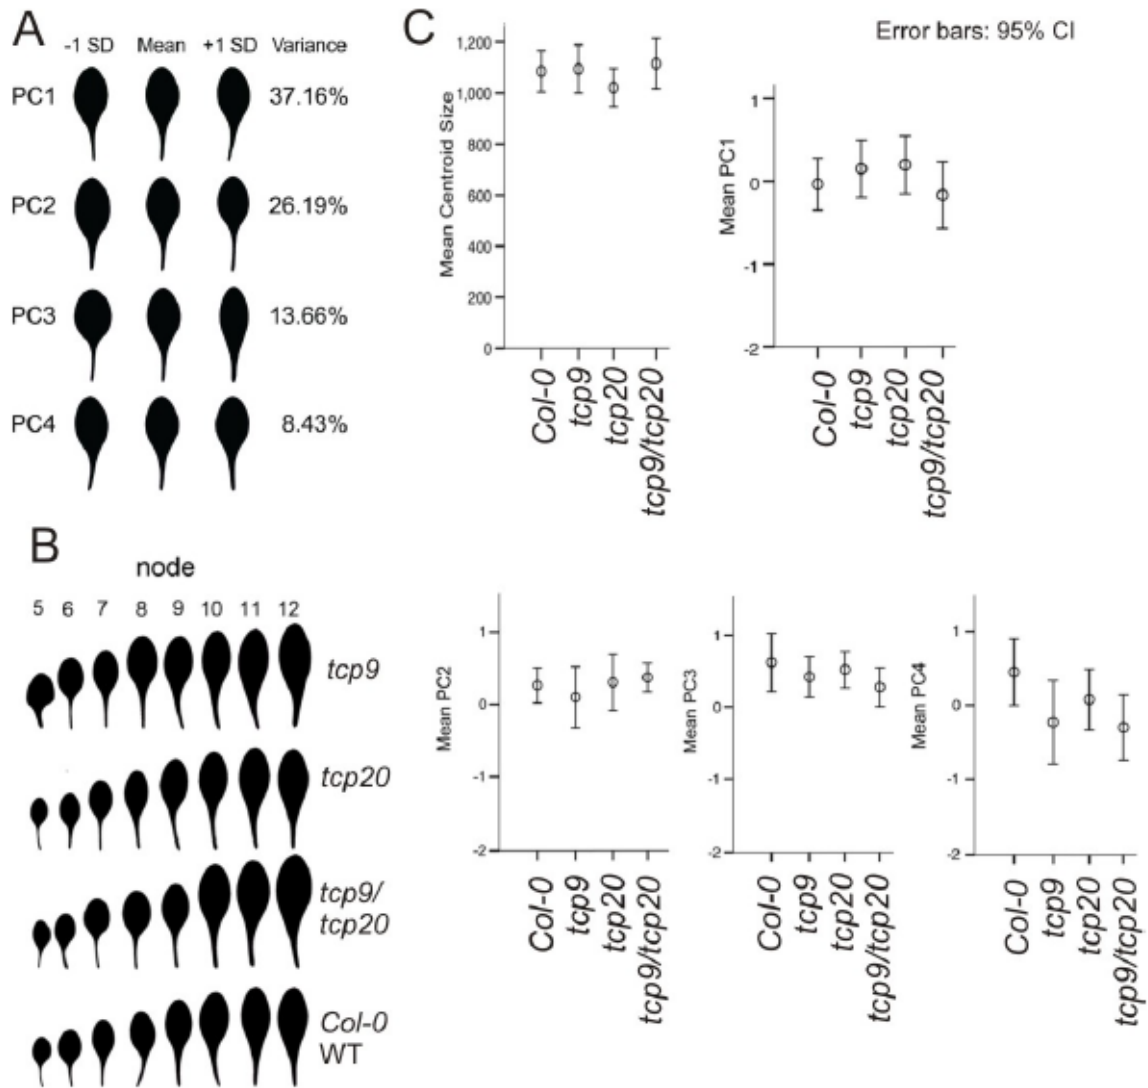

**Supplemental figure 4: Analysis of leaf shape and size.** (A) Variation along the first four PCs for the Arabidopsis leaf-point model after a full Procrustes fit and a Principle Component (PC) analysis. The mean leaf of 1500 leaves together with leaves for 1 SD either side of the mean leaf are shown for each PC. Together, the four PCs represent 85.44% of the total variation in leaf shape. (B) Leaf point models for *Col-0* wild type (WT), *tcp9*, *tcp20* and *tcp9 tcp20* mutant plants. Leaves in node positions 5–12 have been calculated from mean PC1, PC2, PC3 and PC4 values for each leaf and then scaled to the appropriate mean size for each leaf. (C) Mean centroid size (in pixels) and PC scores for all leaves from nodes 5–11 for WT, *tcp9*, *tcp20* and *tcp9tcp20*. Error bars represent 95% confidence intervals. No significant differences in shape and size were detected.

**Supplemental table 1: Potential direct TCP20 target genes**

Values are given as difference between TCP20 JGR and WT experiment (each experiment consists of four arrays, TCP20 JGR, eight hours and zero hours after DEX treatment and the wild type controls)

| AGI       | experiment 1 | experiment 2 | Encoded protein (TAIR10)                                                 |
|-----------|--------------|--------------|--------------------------------------------------------------------------|
| AT1G01580 | -3,476       | -5,439       | FERRIC REDUCTION OXIDASE 2 (FRO2)                                        |
| AT1G02205 | -3,941       | -3,262       | ECERIFERUM 1 (CER1)                                                      |
| AT1G03230 | -2,190       | -2,049       | Eukaryotic aspartyl protease family protein                              |
| AT1G04040 | -2,320       | -4,728       | HAD superfamily, subfamily IIIB acid phosphatase                         |
| AT1G04400 | -2,181       | -2,243       | CRYPTOCHROME 2 (CRY2)                                                    |
| AT1G04430 | 2,616        | 2,106        | S-adenosyl-L-methionine-dependent methyltransferases superfamily protein |
| AT1G04800 | -2,698       | -2,415       | glycine-rich protein                                                     |
| AT1G05560 | -2,869       | -2,804       | UDP-glucose transferase (UGT1)                                           |
| AT1G06100 | -2,660       | -2,054       | Fatty acid desaturase family protein                                     |
| AT1G06360 | -2,302       | -2,431       | Fatty acid desaturase family protein                                     |
| AT1G06475 | 4,179        | 4,259        | unknown protein                                                          |
| AT1G07400 | 4,067        | 4,295        | HSP20-like chaperones superfamily protein                                |
| AT1G08570 | -2,211       | -2,729       | ATYPICAL CYS HIS RICH THIOREDOXIN 4 (ACHT4)                              |
| AT1G08900 | -3,310       | -2,761       | Major facilitator superfamily protein                                    |
| AT1G09200 | -2,413       | -3,006       | Histone superfamily protein                                              |
| AT1G09240 | 3,635        | 3,229        | NICOTIANAMINE SYNTHASE 3 (NAS3)                                          |
| AT1G09380 | 2,884        | 2,076        | nodulin MtN21 /EamA-like transporter family protein                      |
| AT1G09750 | -2,530       | -2,373       | Eukaryotic aspartyl protease family protein                              |
| AT1G13300 | -2,460       | -3,479       | HYPERSENSITIVITY TO LOW PI-ELICITED PRIMARY ROOT SHORTENING 1 (HRS1)     |
| AT1G13607 | -3,576       | -5,245       | Encodes a defensin-like (DEFL) family protein                            |
| AT1G13608 | -4,555       | -4,376       | Encodes a defensin-like (DEFL) family protein                            |
| AT1G13609 | -5,319       | -8,077       | Encodes a defensin-like (DEFL) family protein                            |
| AT1G15125 | -2,797       | -2,690       | S-adenosyl-L-methionine-dependent methyltransferases superfamily protein |
| AT1G17345 | 2,965        | 3,382        | SAUR-like auxin-responsive protein family                                |
| AT1G19510 | 2,508        | 2,335        | RAD-like 5 (RL5)                                                         |
| AT1G21680 | -2,884       | -2,466       | DPP6 N-terminal domain-like protein                                      |
| AT1G22710 | -3,283       | -3,714       | SUCROSE-PROTON SYMPORTER 2 (SUC2)                                        |
| AT1G23020 | -2,487       | -2,614       | FERRIC REDUCTION OXIDASE 3 (FRO3)                                        |
| AT1G23110 | -2,458       | -2,095       | unknown protein                                                          |
| AT1G23720 | -2,648       | -5,660       | Proline-rich extensin-like family protein                                |
| AT1G24145 | -2,652       | -2,730       | unknown protein                                                          |
| AT1G24147 | -3,903       | -2,876       | unknown protein                                                          |
| AT1G25425 | 2,389        | 2,647        | CLAVATA3/ESR-RELATED 43 (CLE43)                                          |
| AT1G31580 | -6,893       | -4,848       | Encodes cell wall protein (ECS1)                                         |

| AGI       | experiment 1 | experiment 2 | Encoded protein (TAIR10)                                                          |
|-----------|--------------|--------------|-----------------------------------------------------------------------------------|
| AT1G32560 | 3,080        | 3,110        | LATE EMBRYOGENESIS ABUNDANT 4-1 (AtLEA4-1)                                        |
| AT1G43970 | -2,848       | -2,110       | unknown protein                                                                   |
| AT1G45070 | 3,161        | 3,259        | transposable element gene                                                         |
| AT1G45201 | -4,143       | -4,474       | TRIACYLGLYCEROL LIPASE-LIKE 1 (TLL1)                                              |
| AT1G45688 | 2,094        | 2,143        | unknown protein                                                                   |
| AT1G47400 | -3,376       | -4,359       | unknown protein                                                                   |
| AT1G48300 | -2,528       | -2,450       | unknown protein                                                                   |
| AT1G50160 | 2,798        | 2,020        | BEST Arabidopsis thaliana protein match is: Polynucleotidyl transferase           |
| AT1G52100 | -2,508       | -3,143       | Mannose-binding lectin superfamily protein                                        |
| AT1G52400 | -2,589       | -2,409       | BETA GLUCOSIDASE 18 (BGLU18)                                                      |
| AT1G53690 | 3,210        | 2,724        | Protein of unknown function that is homologous to At5g41010                       |
| AT1G54010 | -2,168       | -3,999       | GDSL-like Lipase/Acylhydrolase superfamily protein                                |
| AT1G54740 | 2,023        | 2,308        | Protein of unknown function (DUF3049)                                             |
| AT1G54820 | -2,032       | -2,497       | Protein kinase superfamily protein                                                |
| AT1G55850 | -2,970       | -2,983       | CELLULOSE SYNTHASE LIKE E1 (CSLE1)                                                |
| AT1G56300 | 2,133        | 2,912        | Chaperone DnaJ-domain superfamily protein                                         |
| AT1G56430 | -2,704       | -3,283       | NICOTIANAMINE SYNTHASE 4 (NAS4)                                                   |
| AT1G56600 | -2,423       | -2,617       | GALACTINOL SYNTHASE 2 (GolS2)                                                     |
| AT1G59860 | 2,993        | 3,309        | HSP20-like chaperones superfamily protein                                         |
| AT1G61800 | 4,647        | 5,059        | GLUCOSE-6-PHOSPHATE/PHOSPHATE TRANSLOCATOR 2 (GPT2)                               |
| AT1G62000 | -2,272       | -2,176       | unknown protein                                                                   |
| AT1G64370 | -4,076       | -3,040       | unknown protein                                                                   |
| AT1G64400 | -2,859       | -2,548       | long-chain acyl-CoA synthetase 3 (LACS3)                                          |
| AT1G65610 | 2,359        | 2,004        | KORRIGAN 2 (KOR2)                                                                 |
| AT1G66100 | -2,673       | -2,608       | Predicted to encode a PR (pathogenesis-related) protein                           |
| AT1G66270 | -2,259       | -3,980       | BETA GLUCOSIDASE 21 (BGLU21)                                                      |
| AT1G66940 | -2,072       | -2,342       | protein kinase-related                                                            |
| AT1G67360 | 2,399        | 2,009        | Rubber elongation factor protein (REF)                                            |
| AT1G67865 | -2,418       | -3,321       | unknown protein                                                                   |
| AT1G67870 | -3,287       | -2,580       | glycine-rich protein                                                              |
| AT1G67910 | -2,392       | -2,764       | unknown protein                                                                   |
| AT1G68190 | -2,204       | -2,037       | B-box zinc finger family protein                                                  |
| AT1G69160 | -2,402       | -2,258       | unknown protein                                                                   |
| AT1G69530 | -2,018       | -2,309       | EXPANSIN A1 (EXPA1)                                                               |
| AT1G71030 | -2,768       | -2,118       | MYB-LIKE 2 (MYBL2)                                                                |
| AT1G71450 | 3,011        | 3,188        | encodes a member of the DREB subfamily A-4 of ERF/AP2 transcription factor family |
| AT1G73260 | 2,644        | 2,094        | KUNITZ TRYPSIN INHIBITOR 1 (KTI1)                                                 |
| AT1G73330 | -3,107       | -4,913       | DROUGHT-REPRESSED 4 (DR4)                                                         |

| <b>AGI</b> | <b>experiment 1</b> | <b>experiment 2</b> | <b>Encoded protein (TAIR10)</b>                                      |
|------------|---------------------|---------------------|----------------------------------------------------------------------|
| AT1G73920  | -2,575              | -2,168              | alpha/beta-Hydrolases superfamily protein                            |
| AT1G74310  | 2,106               | 2,406               | HEAT SHOCK PROTEIN 101 (HSP101)                                      |
| AT1G74430  | 2,064               | 2,401               | MYB DOMAIN PROTEIN 95 (MYB95)                                        |
| AT1G74670  | -4,022              | -4,465              | GA-STIMULATED ARABIDOPSIS 6 (GASA6)                                  |
| AT1G75380  | -2,682              | -2,404              | BIFUNCTIONAL NUCLEASE IN BASAL DEFENSE RESPONSE 1 (BBD1)             |
| AT1G75390  | 2,139               | 2,124               | basic leucine-zipper 44 (bZIP44)                                     |
| AT1G76210  | 2,193               | 3,250               | Arabidopsis protein of unknown function (DUF241)                     |
| AT1G76680  | -2,781              | -2,148              | 12-OXOPHYTODIENOATE REDUCTASE 1 (OPR1)                               |
| AT1G77760  | -2,677              | -2,563              | NITRATE REDUCTASE 1 (NIA1)                                           |
| AT1G78830  | -2,031              | -2,198              | Curculin-like (mannose-binding) lectin family protein                |
| AT1G80130  | 2,184               | 2,163               | Tetratricopeptide repeat (TPR)-like superfamily protein              |
| AT1G80180  | -2,541              | -2,295              | unknown protein                                                      |
| AT1G80920  | -3,160              | -2,604              | TRANSLOCON AT THE OUTER ENVELOPE MEMBRANE OF CHLOROPLASTS 12 (Toc12) |
| AT2G02990  | 2,822               | 2,920               | RIBONUCLEASE 1 (RNS1)                                                |
| AT2G06850  | 2,078               | 2,601               | XYLOGLUCAN<br>ENDOTRANSGLUCOSYLASE/HYDROLASE 4 (XTH4)                |
| AT2G14635  | -2,421              | -3,338              | unknown protein                                                      |
| AT2G16660  | 2,449               | 2,376               | Major facilitator superfamily protein                                |
| AT2G17840  | 2,374               | 2,373               | EARLY-RESPONSIVE TO DEHYDRATION 7 (ERD7)                             |
| AT2G19620  | 2,381               | 2,023               | N-MYC DOWNREGULATED-LIKE 3 (NDL3)                                    |
| AT2G20560  | 3,086               | 3,650               | DNAJ heat shock family protein                                       |
| AT2G21790  | -2,224              | -2,008              | RIBONUCLEOTIDE REDUCTASE 1 (RNR1)                                    |
| AT2G22122  | -2,109              | -2,614              | unknown protein                                                      |
| AT2G22860  | 4,767               | 5,606               | PHYTOSULFOKINE 2 PRECURSOR (PSK2)                                    |
| AT2G23120  | 2,628               | 2,024               | Late embryogenesis abundant protein, group 6                         |
| AT2G23130  | 2,402               | 2,151               | ARABINOGALACTAN PROTEIN 17 (AGP17)                                   |
| AT2G25770  | 4,179               | 3,168               | Polyketide cyclase/dehydrase and lipid transport superfamily protein |
| AT2G26150  | 4,193               | 4,033               | HEAT SHOCK TRANSCRIPTION FACTOR A2 (HSFA2)                           |
| AT2G27505  | 2,398               | 2,529               | FBD-like domain family protein                                       |
| AT2G27690  | 2,792               | 2,195               | CYTOCHROME P450, FAMILY 94, SUBFAMILY C, POLYPEPTIDE 1 (CYP94C1)     |
| AT2G29090  | 2,976               | 2,680               | CYTOCHROME P450, FAMILY 707, SUBFAMILY A, POLYPEPTIDE 2 (CYP707A2)   |
| AT2G29500  | 5,453               | 4,549               | HSP20-like chaperones superfamily protein                            |

| <b>AGI</b> | <b>experiment 1</b> | <b>experiment 2</b> | <b>Encoded protein (TAIR10)</b>                                                   |
|------------|---------------------|---------------------|-----------------------------------------------------------------------------------|
| AT2G32870  | -2,631              | -2,785              | TRAF-like family protein                                                          |
| AT2G32880  | -5,212              | -6,125              | TRAF-like family protein                                                          |
| AT2G33330  | 2,191               | 2,067               | PLASMODESMATA-LOCATED PROTEIN 3 (PDLP3)                                           |
| AT2G33570  | 2,517               | 2,292               | Domain of unknown function (DUF23)                                                |
| AT2G33830  | -2,831              | -2,707              | Dormancy/auxin associated family protein                                          |
| AT2G33850  | -3,547              | -4,105              | unknown protein                                                                   |
| AT2G34300  | 2,687               | 2,067               | S-adenosyl-L-methionine-dependent methyltransferases superfamily protein          |
| AT2G34430  | -2,477              | -2,242              | LIGHT-HARVESTING CHLOROPHYLL-PROTEIN COMPLEX II SUBUNIT B1 (LHB1B1)               |
| AT2G34600  | 3,124               | 2,653               | jasmonate-zim-domain protein 7 (JAZ7)                                             |
| AT2G34930  | 2,398               | 2,592               | disease resistance family protein / LRR family protein                            |
| AT2G38240  | 3,454               | 3,021               | 2-oxoglutarate (2OG) and Fe(II)-dependent oxygenase superfamily protein           |
| AT2G38465  | 2,757               | 2,221               | unknown protein                                                                   |
| AT2G39310  | -2,796              | -2,286              | jacalin-related lectin 22 (JAL22)                                                 |
| AT2G39470  | -2,233              | -2,855              | PsbP-like protein 2 (PPL2)                                                        |
| AT2G39800  | -3,032              | -2,257              | 1-PYRROLINE-5-CARBOXYLATE SYNTHASE 1 (P5CS1)                                      |
| AT2G40020  | -3,373              | -2,184              | Nucleolar histone methyltransferase-related protein                               |
| AT2G41240  | -5,034              | -5,894              | BASIC HELIX-LOOP-HELIX PROTEIN 100 (BHLH100)                                      |
| AT2G42740  | -2,030              | -2,429              | RIBOSOMAL PROTEIN LARGE SUBUNIT 16A (RPL16A)                                      |
| AT2G42750  | -2,228              | -2,167              | DNAJ heat shock N-terminal domain-containing protein                              |
| AT2G42840  | -3,336              | -3,059              | PROTODERMAL FACTOR 1 (PDF1)                                                       |
| AT2G44940  | 2,330               | 2,324               | encodes a member of the DREB subfamily A-4 of ERF/AP2 transcription factor family |
| AT2G45170  | -2,213              | -3,356              | AUTOPHAGY 8E (ATG8E)                                                              |
| AT2G45660  | -2,823              | -2,450              | AGAMOUS-LIKE 20 (AGL20)                                                           |
| AT2G45680  | 2,310               | 1,910               | TCP9                                                                              |
| AT2G46220  | -2,583              | -2,233              | Uncharacterized conserved protein (DUF2358)                                       |
| AT2G46550  | -2,110              | -2,290              | unknown protein                                                                   |
| AT2G47270  | 3,159               | 2,341               | UPBEAT1 (UPB1)                                                                    |
| AT3G03280  | 2,071               | 2,679               | unknown protein                                                                   |
| AT3G04210  | -2,743              | -2,358              | Disease resistance protein (TIR-NBS class)                                        |
| AT3G05730  | -3,758              | -3,112              | Encodes a defensin-like (DEFL) family protein                                     |
| AT3G08770  | -2,295              | -2,161              | LIPID TRANSFER PROTEIN 6 (LTP6)                                                   |
| AT3G08970  | 2,249               | 2,616               | THERMOSENSITIVE MALE STERILE 1 (TMS1)                                             |
| AT3G09260  | -2,834              | -2,825              | Encodes beta-glucosidase (BGLU23)                                                 |



| <b>AGI</b> | <b>experiment 1</b> | <b>experiment 2</b> | <b>Encoded protein (TAIR10)</b>                                  |
|------------|---------------------|---------------------|------------------------------------------------------------------|
| AT3G09870  | 2,005               | 3,006               | SAUR-like auxin-responsive protein family                        |
| AT3G12110  | 2,221               | 2,252               | ACTIN-11 (ACT11)                                                 |
| AT3G12580  | 2,093               | 2,608               | heat shock protein 70 (HSP70)                                    |
| AT3G14200  | 2,375               | 2,555               | Chaperone DnaJ-domain superfamily protein                        |
| AT3G14210  | -2,573              | -3,053              | EPITHIOSPECIFIER MODIFIER 1 (ESM1)                               |
| AT3G14720  | 2,322               | 2,418               | MAP KINASE 19 (MPK19)                                            |
| AT3G14990  | -2,029              | -2,509              | DJ-1 HOMOLOG A (DJ1A)                                            |
| AT3G15356  | -2,780              | -2,439              | Legume lectin family protein                                     |
| AT3G15650  | 5,583               | 4,968               | alpha/beta-Hydrolases superfamily protein                        |
| AT3G16400  | -3,153              | -3,010              | NITRILE SPECIFIER PROTEIN 1 (NSP1)                               |
| AT3G16450  | -3,039              | -3,573              | Mannose-binding lectin superfamily protein                       |
| AT3G16470  | -2,755              | -2,711              | Mannose-binding lectin superfamily protein                       |
| AT3G16530  | -2,425              | -2,429              | Lectin like protein                                              |
| AT3G16700  | -2,263              | -2,059              | Fumarylacetoacetate (FAA) hydrolase family                       |
| AT3G18290  | -2,723              | -2,767              | BRUTUS (BTS)                                                     |
| AT3G19615  | -2,652              | -2,480              | unknown protein                                                  |
| AT3G20060  | -2,321              | -2,772              | UBIQUITIN-CONJUGATING ENZYME19 (UBC19)                           |
| AT3G20370  | -2,339              | -3,590              | TRAF-like family protein                                         |
| AT3G21352  | 2,283               | 2,543               | unknown protein                                                  |
| AT3G25180  | 3,434               | 2,136               | CYTOCHROME P450, FAMILY 82, SUBFAMILY G, POLYPEPTIDE 1 (CYP82G1) |
| AT3G25770  | -2,213              | -2,656              | ALLENE OXIDE CYCLASE 2 (AOC2)                                    |
| AT3G27060  | -3,624              | -3,043              | TSO MEANING 'UGLY' IN CHINESE 2 (TSO2)                           |
| AT3G27360  | -2,738              | -3,015              | Histone superfamily protein                                      |
| AT3G27690  | -2,944              | -2,978              | PHOTOSYSTEM II LIGHT HARVESTING COMPLEX GENE 2.3 (LHCB2.3)       |
| AT3G28210  | 5,832               | 2,952               | STRESS-ASSOCIATED PROTEIN 12 (SAP12)                             |
| AT3G29810  | 2,379               | 2,165               | COBRA-like protein 2 precursor (COBL2)                           |
| AT3G45140  | -2,881              | -2,832              | LIPOXYGENASE 2 (LOX2)                                            |
| AT3G46230  | 3,340               | 2,898               | HEAT SHOCK PROTEIN 17.4 (HSP17.4)                                |
| AT3G50770  | 2,476               | 2,032               | calmodulin-like 41 (CML41)                                       |
| AT3G51860  | 3,073               | 3,595               | cation exchanger 3 (CAX3)                                        |
| AT3G51970  | 2,687               | 2,355               | acyl-CoA sterol acyl transferase 1 (ASAT1)                       |
| AT3G52720  | -2,765              | -2,976              | CARBONIC ANHYDRASE 1 (CAH1)                                      |
| AT3G53230  | 2,306               | 2,173               | ATPase, AAA-type, CDC48 protein                                  |
| AT3G54590  | -2,099              | -5,096              | HYDROXYPROLINE-RICH GLYCOPROTEIN (ATHRGP1)                       |
| AT3G56360  | -3,539              | -2,465              | unknown protein                                                  |
| AT3G56380  | 5,358               | 3,381               | RESPONSE REGULATOR 17 (ARR17)                                    |
| AT3G56970  | -5,848              | -6,661              | BASIC HELIX-LOOP-HELIX PROTEIN 038 (BHLH038)                     |
| AT3G56980  | -4,135              | -4,178              | BASIC HELIX-LOOP-HELIX PROTEIN 039 (BHLH039)                     |
| AT3G58790  | 2,972               | 2,599               | GALACTURONOSYLTRANSFERASE 15 (GAUT15)                            |

| AGI       | experiment 1 | experiment 2 | Encoded protein (TAIR10)                                                      |
|-----------|--------------|--------------|-------------------------------------------------------------------------------|
| AT3G61210 | -3,851       | -2,646       | S-adenosyl-L-methionine-dependent methyltransferases superfamily protein      |
| AT3G62200 | 2,058        | 2,023        | Putative endonuclease or glycosyl hydrolase                                   |
| AT3G62410 | -2,413       | -2,503       | CP12 DOMAIN-CONTAINING PROTEIN 2 (CP12-2)                                     |
| AT3G62550 | -2,767       | -2,978       | Adenine nucleotide alpha hydrolases-like superfamily protein                  |
| AT3G62760 | 2,182        | 2,597        | Encodes glutathione transferase belonging to the phi class of GSTs (ATGSTF13) |
| AT3G63160 | -3,284       | -2,918       | unknown protein                                                               |
| AT4G00695 | 3,178        | 2,064        | unknown protein                                                               |
| AT4G00780 | -4,841       | -4,524       | TRAF-like family protein                                                      |
| AT4G01250 | 2,380        | 2,279        | AtWRKY22                                                                      |
| AT4G01360 | 2,340        | 2,047        | unknown protein                                                               |
| AT4G01640 | 2,974        | 3,018        | F-box associated ubiquitination effector family protein                       |
| AT4G02160 | 2,967        | 3,533        | unknown protein                                                               |
| AT4G02380 | -2,841       | -2,646       | SENESCENCE-ASSOCIATED GENE 21 (SAG21)                                         |
| AT4G02520 | -2,281       | -2,396       | GLUTATHIONE S-TRANSFERASE PHI 2 (GSTF2)                                       |
| AT4G03400 | 2,491        | 3,378        | DWARF IN LIGHT 2 (DFL2)                                                       |
| AT4G05070 | -2,311       | -2,282       | Wound-responsive family protein                                               |
| AT4G07960 | 2,655        | 2,236        | CELLULOSE-SYNTHASE-LIKE C12 (CSLC12)                                          |
| AT4G09030 | 2,447        | 2,180        | ARABINO GALACTAN PROTEIN 10 (AGP10)                                           |
| AT4G11250 | 2,366        | 3,419        | AGAMOUS-like 52 (AGL52)                                                       |
| AT4G11320 | -3,898       | -4,087       | Papain family cysteine protease                                               |
| AT4G12400 | 2,363        | 3,292        | HOP3 (Hop3)                                                                   |
| AT4G13570 | 2,081        | 3,041        | HISTONE H2A 4 (HTA4)                                                          |
| AT4G14400 | -4,239       | -4,128       | ACCELERATED CELL DEATH 6 (ACD6)                                               |
| AT4G17245 | -2,372       | -2,369       | RING/U-box superfamily protein                                                |
| AT4G17670 | 2,805        | 2,869        | Protein of unknown function (DUF581)                                          |
| AT4G17770 | 2,708        | 2,591        | TREHALOSE PHOSPHATASE/SYNTHASE 5 (TPS5)                                       |
| AT4G19660 | -2,279       | -2,138       | NPR1-LIKE PROTEIN 4 (NPR4)                                                    |
| AT4G19690 | -4,525       | -7,865       | IRON-REGULATED TRANSPORTER 1 (IRT1)                                           |
| AT4G19840 | -3,184       | -3,188       | PHLOEM PROTEIN 2-A1 (PP2-A1)                                                  |
| AT4G21320 | 2,111        | 2,110        | HEAT-STRESS-ASSOCIATED 32 (HSA32)                                             |
| AT4G21445 | -2,329       | -2,117       | unknown protein                                                               |
| AT4G21680 | 3,226        | 2,496        | NITRATE TRANSPORTER 1.8 (NRT1.8)                                              |
| AT4G23700 | -2,609       | -3,438       | CATION/H+ EXCHANGER 17 (CHX17)                                                |
| AT4G24800 | -2,385       | -2,019       | EIN2 C-TERMINUS INTERACTING PROTEIN 1 (ECIP1)                                 |
| AT4G25100 | 2,622        | 4,110        | FE SUPEROXIDE DISMUTASE 1 (FSD1)                                              |
| AT4G26530 | -3,965       | -3,695       | Aldolase superfamily protein                                                  |
| AT4G27440 | -2,607       | -2,201       | PROTOCHLOROPHYLLIDE OXIDOREDUCTASE B (PORB)                                   |

| <b>AGI</b> | <b>experiment 1</b> | <b>experiment 2</b> | <b>Encoded protein (TAIR10)</b>                                                   |
|------------|---------------------|---------------------|-----------------------------------------------------------------------------------|
| AT4G27860  | -2,175              | -2,037              | vacuolar iron transporter (VIT) family protein                                    |
| AT4G28780  | -2,796              | -2,384              | GDSL-like Lipase/Acylhydrolase superfamily protein                                |
| AT4G32800  | 2,263               | 3,260               | encodes a member of the DREB subfamily A-4 of ERF/AP2 transcription factor family |
| AT4G34560  | -2,461              | -2,093              | unknown protein                                                                   |
| AT4G34710  | -3,033              | -2,609              | ARGININE DECARBOXYLASE 2 (ADC2)                                                   |
| AT4G34950  | 3,700               | 3,690               | Major facilitator superfamily protein                                             |
| AT4G35320  | 3,314               | 2,770               | unknown protein                                                                   |
| AT4G37925  | -2,952              | -3,085              | SUBUNIT NDH-M OF NAD(P)H:PLASTOQUINONE DEHYDROGENASE COMPLEX (NDH-M)              |
| AT4G37980  | -2,772              | -2,236              | elicitor-activated gene 3-1 (ELI3-1)                                              |
| AT4G39250  | 2,067               | 3,291               | RAD-like 1 (RL1)                                                                  |
| AT5G01380  | 3,746               | 3,197               | Homeodomain-like superfamily protein                                              |
| AT5G02490  | 3,813               | 3,643               | Heat shock protein 70 (Hsp 70) family protein                                     |
| AT5G02780  | -2,459              | -4,130              | GLUTATHIONE TRANSFERASE LAMBDA 1 (GSTL1)                                          |
| AT5G04150  | -2,703              | -3,125              | BASIC-HELIX-LOOP-HELIX PROTEIN 100 (bHLH100)                                      |
| AT5G04840  | 2,480               | 2,606               | bZIP protein                                                                      |
| AT5G05250  | -3,960              | -3,052              | unknown protein                                                                   |
| AT5G05365  | 4,254               | 4,687               | Heavy metal transport/detoxification superfamily protein                          |
| AT5G05600  | 2,590               | 2,641               | 2-oxoglutarate (2OG) and Fe(II)-dependent oxygenase superfamily protein           |
| AT5G06720  | 3,200               | 3,284               | peroxidase 2 (PA2)                                                                |
| AT5G09220  | -2,782              | -3,262              | AMINO ACID PERMEASE 2 (AAP2)                                                      |
| AT5G11360  | 2,075               | 2,196               | Interleukin-1 receptor-associated kinase 4 protein                                |
| AT5G11790  | 2,607               | 2,538               | N-MYC DOWNREGULATED-LIKE 2 (NDL2)                                                 |
| AT5G12020  | 4,664               | 3,606               | 17.6 KDA CLASS II HEAT SHOCK PROTEIN (HSP17.6II)                                  |
| AT5G12030  | 2,180               | 2,548               | HEAT SHOCK PROTEIN 17.6A (HSP17.6A)                                               |
| AT5G13740  | -2,386              | -2,862              | ZINC INDUCED FACILITATOR 1 (ZIF1)                                                 |
| AT5G16360  | 4,387               | 2,921               | NC domain-containing protein-related                                              |
| AT5G19530  | -2,357              | -2,204              | NC domain-containing protein-related                                              |
| AT5G20190  | 2,736               | 2,387               | Tetratricopeptide repeat (TPR)-like superfamily protein                           |
| AT5G20630  | -3,933              | -3,442              | GERMIN 3 (GER3)                                                                   |
| AT5G21940  | -2,517              | -2,669              | unknown protein                                                                   |
| AT5G22545  | 2,252               | 2,572               | unknown protein                                                                   |
| AT5G22880  | -2,411              | -2,700              | HISTONE H2B (H2B)                                                                 |

| AGI       | experiment 1 | experiment 2 | Encoded protein (TAIR10)                                                                                     |
|-----------|--------------|--------------|--------------------------------------------------------------------------------------------------------------|
| AT5G23820 | -4,168       | -6,441       | MD-2-related lipid recognition domain-containing protein                                                     |
| AT5G24080 | 2,063        | 2,201        | Protein kinase superfamily protein                                                                           |
| AT5G24490 | -2,292       | -2,440       | 30S ribosomal protein, putative                                                                              |
| AT5G25140 | 2,849        | 3,022        | putative cytochrome P450                                                                                     |
| AT5G25460 | -2,177       | -2,407       | Protein of unknown function, DUF642                                                                          |
| AT5G25980 | -2,679       | -4,507       | BETA GLUCOSIDASE 37 (BGLU37)                                                                                 |
| AT5G26000 | -2,474       | -2,339       | BETA GLUCOSIDASE 38 (BGLU38)                                                                                 |
| AT5G26850 | -2,116       | -2,006       | Uncharacterized protein                                                                                      |
| AT5G28800 | 3,041        | 2,084        | unknown protein                                                                                              |
| AT5G37260 | -4,315       | -3,049       | REVEILLE 2 (RVE2)                                                                                            |
| AT5G37540 | 2,137        | 2,168        | Eukaryotic aspartyl protease family protein                                                                  |
| AT5G39050 | -2,070       | -2,251       | PHENOLIC GLUCOSIDE MALONYLTRANSFERASE 1 (PMAT1)                                                              |
| AT5G43380 | 2,749        | 2,394        | TYPE ONE SERINE/THREONINE PROTEIN PHOSPHATASE 6 (TOPP6)                                                      |
| AT5G43570 | 4,058        | 3,399        | Predicted to encode a PR (pathogenesis-related) peptide that belongs to the PR-6 proteinase inhibitor family |
| AT5G46890 | -2,778       | -5,002       | Bifunctional inhibitor/lipid-transfer protein/seed storage 2S albumin superfamily protein                    |
| AT5G48485 | -2,914       | -2,167       | DEFECTIVE IN INDUCED RESISTANCE 1 (DIR1)                                                                     |
| AT5G48490 | -4,847       | -4,317       | Bifunctional inhibitor/lipid-transfer protein/seed storage 2S albumin superfamily protein                    |
| AT5G48570 | 4,195        | 4,229        | Encodes one of the 36 carboxylate clamp (CC)-tetratricopeptide repeat (TPR) proteins                         |
| AT5G51000 | 2,510        | 3,058        | F-box and associated interaction domains-containing protein                                                  |
| AT5G51440 | 3,385        | 3,887        | HSP20-like chaperones superfamily protein                                                                    |
| AT5G52640 | 2,999        | 3,716        | HEAT SHOCK PROTEIN 90.1 (HSP90.1)                                                                            |
| AT5G53420 | 2,021        | 2,190        | CCT motif family protein                                                                                     |
| AT5G53450 | -3,014       | -2,987       | OBP3-responsive gene 1 (ORG1)                                                                                |
| AT5G54030 | 2,367        | 2,446        | Cysteine/Histidine-rich C1 domain family protein                                                             |
| AT5G55970 | -2,416       | -2,838       | RING/U-box superfamily protein                                                                               |
| AT5G57220 | -3,308       | -2,858       | CYTOCHROME P450, FAMILY 81, SUBFAMILY F, POLYPEPTIDE 2 (CYP81F2)                                             |
| AT5G58750 | 2,331        | 2,674        | NAD(P)-binding Rossmann-fold superfamily protein                                                             |
| AT5G59400 | 3,020        | 2,410        | unknown protein                                                                                              |
| AT5G59690 | -2,453       | -3,059       | Histone superfamily protein                                                                                  |
| AT5G59870 | -2,457       | -2,681       | NAD(P)-binding Rossmann-fold superfamily protein                                                             |

| AGI       | experiment 1 | experiment 2 | Encoded protein (TAIR10)               |
|-----------|--------------|--------------|----------------------------------------|
| AT5G60680 | -2,450       | -2,378       | unknown protein                        |
| AT5G61270 | 2,686        | 2,741        | PHYTOCHROME-INTERACTING FACTOR7 (PIF7) |
| AT5G63810 | -2,092       | -2,253       | BETA-GALACTOSIDASE 10 (BGAL10)         |
| AT5G64190 | 2,547        | 3,032        | unknown protein                        |
| AT5G65470 | 2,525        | 2,784        | O-fucosyltransferase family protein    |

### Supplemental table 2: Primers used in this study

In the first half the primers that have been used for ChIP-PCR analyses detecting binding of TCP20 on the LOX2 and the TCP9 promoters are depicted. Given are the names of the fragments and promoters, product length and the sequences for forward and reverse primers. In the second part primers analyzed for the effect of TCP20 on target gene transcripts are given, along with the AGIs the common gene names of these targets and the forward and reverse primers used for the analysis.

| Promoter fragment | Product length (bp)        | Forward primer (5'→3')       | Reverse primer (5'→3')      |
|-------------------|----------------------------|------------------------------|-----------------------------|
| pLOX2neg-5283     | 157                        | CTCATATATCAAAGGAATTTACAATAT  | GAATATTTAACCCAATTTTGAATTCA  |
| pLOX2neg-4464     | 142                        | GCAGGTAATGTGGGAGATTAAAA      | CTCATCTTATAAATATATAGAGAGGT  |
| pLOX2neg-3663     | 117                        | GCATTTTCGTTTTCCATTTACTTAA    | CTTTCTTCATACTTAAACTCATAAC   |
| TGGGC             | 142                        | CATGAGATGTTTTAACCGTTCTAAGT   | ATTAACAATTGTTGGCTATATACTCC  |
| GCCCG             | 131                        | CCCACTTTTCTCAAGAAGATCATT     | CTCAACATACCATTTTATCACGT     |
| TCP4 BS1          | 96                         | TGTTACACATTACTTGATGTTTTTC    | TTCTGCGCTTTGTTGTCTAAATAG    |
| TCP4 BS2          | 93                         | CCACCTAAAAGTACAGGATATGATTTCT | ATGGCCGGTTCCTCCAAAAGTAC     |
| pTCP9             | 63                         | TTGGGCCTAGCCCTCAACAAT        | GTCCAGCTCAGGCCACATT         |
| TCP4 BS3          | 99                         | GATGAAAAGAGCTGCATTCT         | CATCACATGCAATATCGGGTAAGGTCA |
| AGI               | Common gene name           | Forward primer (5'→3')       | Reverse primer (5'→3')      |
| At2g28390         | <i>SAND-family protein</i> | AACTCTATGCAGCATTTGATCCACT    | TGATTGCATATCTTTATCGCCATC    |
| At3g15030         | <i>TCP4</i>                | TTCGGAAGGATTACAGAGACTAGTGG   | AGGAGTAGGAGGAGCGAACAGAAAC   |
| At3g27010         | <i>TCP20</i>               | TTAGGCTTGCTCAAGAAGGGAATG     | GCATATGGTGAAGAACCCTACCTTG   |
| At3g45140         | <i>LOX2</i>                | GATGCCCCAGTTCTCATAACAGGG     | CGGGTCTAGTTTGTCTATTAACGGC   |
| At2g45680         | <i>TCP9</i>                | TGCCGTCGTTTTCAATGTCTTTAGC    | TTCTCCCTTCTCTTCAACCTTCG     |
| At4g34270         | <i>TIP41-like protein</i>  | GTGAAAAGTGTGGAGAGAAGCAA      | TCAACTGGATACCTTTTCGCA       |
| At1g72010         | <i>TCP22</i>               | GTAGTAACTGCACCAATGGGGTCA     | CCAAACCATCGCTCTACTGCC       |
| At1g58100         | <i>TCP8</i>                | CAAATGGAGAGTAGTAGCAACAATA    | GTAAGTATCCATCGGAAAAGTAAA    |
